# Supplementary material
Source: PubMed Central journal article supplement (PMC6748620)
Supplement: NIHMS956150-supplement-citation_information.pdf [file NIHMS956150-supplement-citation_information.pdf]

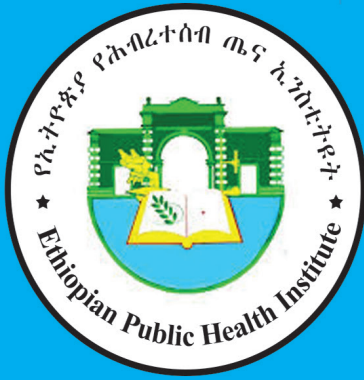

# Ethiopian Journal of Public Health and Nutrition

## Editorial

- 70 **Whole genome sequencing and metagenomics for public health use in Ethiopia**  
*Eshetu Lemma*

## Original Articles

- 72 **Safety and nutritional quality of commonly consumed commercial edible oils in Addis Ababa**  
*Kifle Habte, Aweke Kebede, Masresha Tessema, Kirubel Tesfaye and Tesfaye Hailu*
- 78 **Incidence of tuberculosis and associated factors among chronic HIV care followers of East Gojjam**  
*Sintayehu Abate, Akberet Lemlem, Ibrahim Kedir, Tesfahun Melese, Fikreselassie Getachew, Getnet kebede and Mamo Wubshet*
- 86 **Drug resistance pattern of diarrheogenic *Enterobacteriaceae* among HIV seropositive individuals on Cotrimoxazole at St. Paul's Millennium Medical College, Addis Ababa**  
*Mengistu Tadesse, Zekariyas Dagne, Bethlehem Tadesse and Getu Diriba*
- 93 **Assessment of national tuberculosis and HIV collaborative programs in Ethiopia**  
*Wudinesh Belete, Minilik Demissie, Atsbeha Gebreegziabher, Desta Kassa, Gebremedine G/Michael, Getnet Mesfin, Abebaw Kebede, Andargachew Kumsa, Lelissa Fekadu, Biruck Kebede, Fekadeselassie Mikru, Kassa Hailu, Addisalem Yilma, Eshetu Kebede, Ismael Hassen, Abera Bekele, Getachew Wondimagegne, Kumlachew Abate, Daniel Fiseha, Ezra Shimeles and Yibeltal Assefa*
- 99 **Conventional and molecular diagnosis of smear negative pulmonary TB and concordance of empirical TB diagnosis with culture assay**  
*Muluwork Getahun, Zekarias Dagne, Zelalem Yaregal, Aster H/Mariam, Shewki Moga, Abyot Meaza, Abebaw Kebede and Yetnebersh Feseha*
- 105 **Goiter prevalence and urinary iodine concentration in Ethiopian women and school age children**  
*Girmay Ayana, Adamu Belay, Meseret W/Yohaness, Tesfaye Zeru, Hulumtaye Tefera, Addisu Legesse, Nigat Ashenafi, Chere Tadesse, Yoseph Demelash, Getamesay Behailu, Melkitu Kassaw, Solomon Eshetu and Dilnesaw Zerfu*

**Published by Ethiopian Public Health Institute**
